# The Clinical Significance of Vancomycin Minimum Inhibitory Concentration in *Staphylococcus aureus* Infections: A Systematic Review and Meta-analysis

S. J. van Hal,<sup>1,2</sup> T. P. Lodise,<sup>3</sup> and D. L. Paterson<sup>4</sup>

<sup>1</sup>Department of Microbiology and Infectious Diseases, Sydney South West Pathology Services–Liverpool, South Western Sydney Local Health Network, New South Wales; <sup>2</sup>Antibiotic Resistance and Mobile Elements Group, Microbiology and Infectious Diseases Unit, School of Medicine, University of Western Sydney, Australia; <sup>3</sup>Albany College of Pharmacy and Health Sciences, New York; and <sup>4</sup>University of Queensland Centre for Clinical Research, Royal Brisbane and Womens Hospital Campus, Australia.

(See the Editorial Commentary by Deresinski, on pages 772–4.)

**Background.** Emerging data suggest that vancomycin may be less effective against serious methicillin-resistant *Staphylococcus aureus* (MRSA) infections with minimum inhibitory concentration (MIC) values at the higher end of the susceptibility range. The purpose of this review is to examine the strength of these associations.

**Methods.** All relevant studies pertaining to treatment outcomes or mortality associated with vancomycin MIC were retrieved from the medical literature from January 1996 through August 2011 and analyzed according to Cochrane guidelines.

**Results.** Of the 270 studies identified, 48 studies were reviewed, with 22 studies included in the final meta-analysis. Vancomycin MIC was significantly associated with mortality for MRSA infection irrespective of the source of infection or MIC methodology (odds ratio [OR], 1.64; 95% confidence interval [CI], 1.14–2.37;  $P < .01$ ). This mortality association was predominantly driven by bloodstream infections (BSIs; OR, 1.58; 95% CI, 1.06–2.37;  $P = .03$ ) and isolates with a vancomycin MIC of 2 µg/mL by Etest (OR, 1.72; 95% CI, 1.34–2.21;  $P < .01$ ). Vancomycin MIC was significantly associated with treatment failure irrespective of source of infection or MIC methodology (OR, 2.69; 95% CI, 1.60–4.51;  $P < .01$ ).

**Conclusion.** High vancomycin MIC was associated with a higher mortality rate in MRSA BSI. Thus, institutions should consider conducting Etest MICs on all MRSA BSI isolates. Although these data highlight concerns about vancomycin, currently, there are no data to support better survival rates with alternative antibiotics. Data are sorely needed to determine whether other agents can remedy these outcomes observed with vancomycin for MRSA infections with elevated vancomycin MIC values.

Infections caused by methicillin-resistant *Staphylococcus aureus* (MRSA) are a major public concern. Hospital-acquired MRSA infection rates have steadily

increased over the past 25 years, and the bacterial strain is making inroads to the community [1–6]. Vancomycin is currently the cornerstone of therapy for serious infections caused by this pathogen. Although vancomycin has been widely used in the treatment of MRSA infection for the past 2 decades [7], the majority of MRSA strains have remained susceptible to vancomycin at the current minimum inhibitory concentration (MIC) susceptibility breakpoint designated by the Clinical Laboratory Standards Institute (CLSI) [2]. It has taken approximately 40 years for the first isolates with reduced susceptibility to glycopeptides to emerge.

Received 14 July 2011; accepted 6 October 2011; electronically published 2 February 2012.

Correspondence: Sebastiaan J. M. van Hal, FRACP, FRCPA, Department of Microbiology and Infectious Diseases, Sydney South West Pathology Service–Liverpool, South Western Sydney Local Health Network, New South Wales, Liverpool Hospital, Locked Bag 7090, Liverpool BC NSW 1087, Sydney, Australia (S.VanHal@uws.edu.au).

**Clinical Infectious Diseases** 2012;54(6):755–71

© The Author 2012. Published by Oxford University Press on behalf of the Infectious Diseases Society of America. All rights reserved. For Permissions, please e-mail: journals.permissions@oup.com.

DOI: 10.1093/cid/cir935

Despite its sustained in vitro microbiologic inhibitory activity, researchers are beginning to question the continued clinical usefulness of vancomycin for MRSA infection. In particular, emerging data suggest that vancomycin may be less effective against serious MRSA infection with MIC values at the higher end of the susceptibility range. Although the CLSI susceptibility breakpoint has been reduced to 2 µg/mL (previously 4 µg/mL), the increased rate of failures reported for MRSA infection at 2 mg/L has prompted a debate about whether the MIC breakpoints should be decreased even further. The consequence of such a decision would be to reduce the role of vancomycin substantially, if not relegate it to the antibiotic scrapheap, especially in institutions documenting vancomycin MIC creep [8]. The purpose of this review is to examine the strength of these associations and identify the future role of vancomycin.

## METHODS

### Search Strategy and Selection Criteria

Studies were retrieved from PubMed, Embase, Cochrane Controlled Trial Registry, and Medline databases from January 1996 through August 2011. Search terms included “*Staphylococcus aureus*” or “*S. aureus*” or “methicillin resistant *Staphylococcus aureus*,” “vancomycin” and “minimum inhibitory concentration” or “MIC” in combination with “mortality” or “death.” Similar searches were performed for clinical or microbiological treatment failure with the terms “*Staphylococcus aureus*,” “vancomycin,” and “minimum inhibitory concentration” or “MIC” in combination with any one of the following: “treatment failure,” “outcome,” “persistent bacteremia,” or “microbiological failure.” References were also identified from the bibliographies of studies retrieved from the aforementioned literature search.

The abstracts of all studies were reviewed. A study was considered to be eligible for inclusion if outcomes of interest were presented for *S. aureus* infections by vancomycin MIC strata. The MIC methodologies considered to be appropriate included broth microdilution (BMD), automated BMD, and Etest. In contrast, studies using agar dilution and disc diffusion for vancomycin MIC measurements were excluded because these methods are no longer considered to be accurate [9]. In addition, authors were contacted (wherever possible) to provide further details on mortality, treatment failure, or MIC methodology used. Studies written in languages other than English and those presented solely as abstracts at scientific conferences were excluded.

### Data Extraction, Outcomes, and Data Analysis

Data extracted from the identified studies included clinical setting, number of patients studied, *S. aureus* infection type, breakdown of *S. aureus* episodes by susceptibility pattern, MIC methodology

used, vancomycin treatment duration, microbiological failure, treatment failure, and patient mortality. The bacteremic source was further classified into 3 mortality risk categories: high-risk (which included endovascular, lower respiratory tract, abdominal, and CNS foci), intermediate-risk (which included osteoarticular, soft-tissue, and unknown foci), and low-risk sources (which included intravenous catheter and urinary tract foci).

The primary outcome was all-cause 30-day mortality. Secondary predefined outcomes were treatment or microbiological failure. For treatment failure, the definition in each study was used. Heteroresistant vancomycin-intermediate *S. aureus* (hVISA) infections were excluded from the analysis when these details were present in the relevant studies.

Data analysis was performed using RevMan version 5.1 for Windows [10], and performed according to Cochrane guidelines. Odds ratios (ORs) and 95% confidence intervals (CIs) for dichotomous variables were calculated. Meta-analysis was performed using fixed-effects models, unless significant heterogeneity was observed, in which case random-effects models were used. Heterogeneity was assessed using the  $\chi^2$  test, with the extent of inconsistency assessed using  $I^2$  statistics. A *P* value of .05 was regarded as statistically significant. Predetermined subgroup analyses were performed on the basis of MIC methodology, *S. aureus* infection type, and *S. aureus* characterized by susceptibility pattern.

## RESULTS

Our literature search identified 270 studies (Figure 1), of which 48 studies were reviewed [11–58]. Of these, 25 studies were included in the meta-analysis (Table 1). Twenty-three studies were excluded for the following reasons: no MIC data were presented against outcomes (11 studies) [16, 24, 27, 29, 30, 31, 33, 46, 51, 56, 57], inappropriate MIC testing methodology was used (3 studies) [13, 35, 44], case reports (2 studies) [11, 38], and nonrelevance (7 studies) [14, 18, 20, 22, 28, 37, 40].

Of the 25 studies that made the preliminary eligibility cut, 3 were excluded from the meta-analysis because all used different MIC cutoffs [39, 48, 49]. The study by Rubenstein et al [48] did not have any isolates with a vancomycin MIC >1 µg/mL in the vancomycin-treated arm. The study by Sakoulas et al [49] combined isolates with vancomycin MICs of 1 µg/mL and 2 µg/mL into 1 group, and the data available did not allow for separation into 2 distinct categories. Thus, a total of 22 studies were included in this meta-analysis, subsets of which were also analyzed to answer specific inquiries as described next.

### Overall 30-Day Mortality

Seventeen of the 22 studies provided data on mortality and vancomycin MICs involving 3332 MRSA-infected and 517

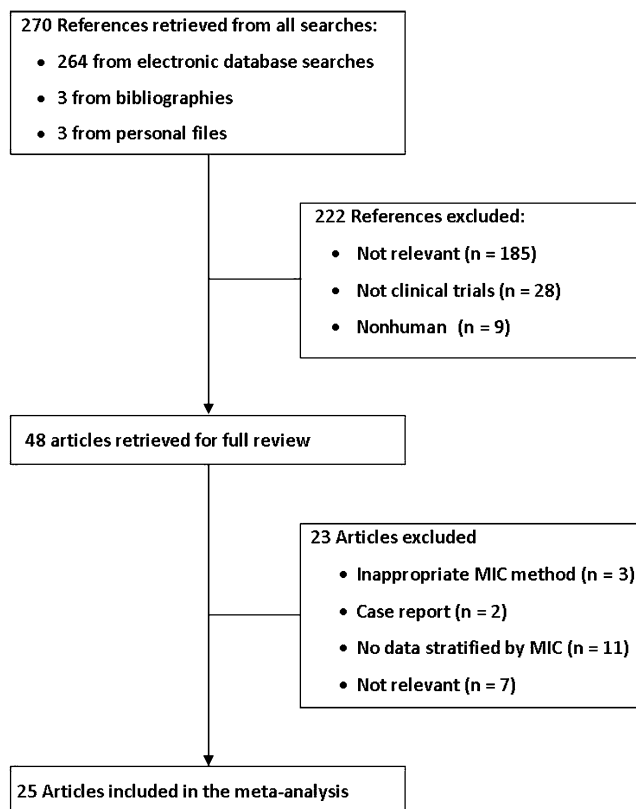

**Figure 1.** Quality of reporting of meta-analysis profile showing flow of studies included in the meta-analysis. Abbreviation: MIC, minimum inhibitory concentration.

methicillin-susceptible *S. aureus* (MSSA)-infected patients [12, 15, 19, 23, 26, 32, 34, 36, 43, 45, 47, 50, 52–55, 58]. From these episodes, there were 2383 MRSA and 507 MSSA bloodstream infections (BSIs), and 949 MRSA and 10 MSSA non-BSIs.

All 17 studies provided mortality data for high MIC ( $\geq 1.5$   $\mu\text{g/mL}$ ) relative to low vancomycin MIC infections ( $< 1.5$   $\mu\text{g/mL}$ ; Table 1). When pooling all the data irrespective of the source of infection, antimicrobial susceptibility (MSSA and MRSA), or MIC methodology, vancomycin MIC was not associated with mortality among those with *S. aureus* infection (OR, 1.41; 95% CI, .95–2.10;  $P = .09$ ). This finding did not change if data was pooled by source of infection: BSI (OR, 1.36; 95% CI, .86–2.15;  $P = .19$ ), compared with non-BSI (OR, 1.47; 95% CI, .88–2.47;  $P = .14$ ). Vancomycin MIC was not associated with increased mortality in MSSA BSI episodes (OR, 0.65; 95% CI, .65–10.49;  $P = .76$ ).

Vancomycin MIC was significantly associated with mortality associated with MRSA infection irrespective of the source of infection or MIC methodology (OR, 1.64; 95% CI, 1.14–2.73;  $P < .01$ ) (Figure 2) when patients with MSSA infection were excluded (study by Price et al [47] and the MSSA subsets from Schweizer et al [50] and Holmes et al [23]). This association was

secondary to BSI (OR, 1.58; 95% CI, 1.06–2.37;  $P = .03$ ), because vancomycin MIC was not a predictor of mortality associated with non-BSI (OR, 1.42; 95% CI, .82–2.43;  $P = .21$ ).

Except for 2 studies [34, 55], Etest was the methodology used for MIC determination. After limiting the data to Etest vancomycin MIC testing only, MRSA BSI was no longer associated with increased mortality (OR, 1.52; 95% CI, .95–2.24;  $P = .08$ ).

Eight studies, each of which used Etest, provided mortality data for high MIC infections stratified into 1.5 and  $\geq 2$   $\mu\text{g/mL}$  categories [12, 19, 23, 43, 45, 47, 50, 52, 54] (Table 2). There was no statistically significant difference in mortality associated with *S. aureus* infection with a vancomycin MIC of 1.5  $\mu\text{g/mL}$  compared with an MIC  $\leq 1$   $\mu\text{g/mL}$  (OR, 1.11; 95% CI, .84–1.45;  $P = .45$ ; Figure 3). However, an Etest MIC  $\geq 2$   $\mu\text{g/mL}$  was significantly associated with an increased mortality (OR, 1.74; 95% CI, 1.34–2.21;  $P < .01$ ; Figure 4). These associations remained when limiting the data to any MRSA infection or MRSA BSI only.

Although the proportion of high- and low-risk BSI sources was similar among studies (Table 1), no study stratified MIC data by source of bacteremia, thus it remains unclear whether a high MIC line-related BSI (low risk) has similar implications to a high MIC endovascular BSI (high risk).

### Treatment Failure

Eleven of the 22 studies provided data on treatment failure and vancomycin MIC involving 1439 MRSA-infected (552 BSI; 887 non-BSI) and 0 MSSA-infected patients [12, 15, 17, 21, 25, 32, 36, 41, 42, 53, 58]. Although definitions varied among studies (Table 1), vancomycin MIC was significantly associated with treatment failure (OR, 2.69; 95% CI, 1.60–4.51;  $P < .01$ ; Figure 5). This association did not change substantively when excluding studies enriched for vancomycin failure [41, 42] (OR, 2.22; 95% CI, 1.30–3.79;  $P < .01$ ) or when excluding studies using non-Etest MIC methodology (OR, 2.12; 95% CI, 1.14–3.96;  $P = .02$ ) [17, 41, 42, 58]. Likewise, the association between vancomycin MIC and treatment failure did not change substantially when pooling studies using similar treatment failure definitions. When limited to studies that examined persistent bacteremia [12, 32, 36, 41, 58], the OR for high vancomycin MIC was 2.44, but the 95% CI spanned zero (95% CI, .72–8.24;  $P = .15$ ) [12, 32, 36, 41, 58]. Similarly, the OR was 2.81 (95% CI, 1.73–4.59;  $P < .01$ ) when the analysis was restricted to studies that focused on clinical failure [15, 17, 21, 25, 42]. Similar to the mortality analysis, treatment failure was more likely to occur in MRSA BSI episodes (OR, 2.91; 95% CI, 1.26–6.72;  $P = .01$ ) than in non-BSI episodes (OR, 1.96; 95% CI, 1.25–3.07;  $P < .01$ ). Similar to the mortality analysis, treatment failure was more likely to occur in MRSA BSI episodes (OR, 2.91; 95% CI, 1.26–6.72;  $P = .01$ ) than in non-BSI episodes (OR, 1.96; 95% CI, 1.25–3.07;  $P < .01$ ).

**Table 1. Characteristics of Eligible Studies Examining the Association Between Outcomes and Vancomycin Minimum Inhibitory Concentration**

| Reference        | Study Population                                                                                                | Number of MRSA (MSSA) Isolates | Source                              | MIC Method | Overall Mortality % (n)<br>Vancomycin MIC (μg/mL) |                           |         | Definition of Treatment Failure                                                                  | Treatment Failure<br>Vancomycin MIC (μg/mL) |             |         | Comments                                                                                                                         |
|------------------|-----------------------------------------------------------------------------------------------------------------|--------------------------------|-------------------------------------|------------|---------------------------------------------------|---------------------------|---------|--------------------------------------------------------------------------------------------------|---------------------------------------------|-------------|---------|----------------------------------------------------------------------------------------------------------------------------------|
|                  |                                                                                                                 |                                |                                     |            | <1.5                                              | ≥1.5                      | P Value |                                                                                                  | <1.5                                        | ≥1.5        | P Value |                                                                                                                                  |
| Bae et al [12]   | Prospective, multicenter study (ICE)                                                                            | 65 (0)                         | BSI<br>High risk: 100% <sup>c</sup> | Etest      | 39% (11/28)                                       | 35% (13/37)               | .24     | Persistent bacteremia despite >3 d of antibiotics                                                | 43% (12/28)                                 | 49% (18/37) | .19     | hVISA (detected by PAP-AUC method) present in 19 (29%) MRSA isolates                                                             |
| Choi et al [15]  | Retrospective, single-center, vancomycin-treated (>48 h) cohort study                                           | 70 (0)                         | HAP                                 | Etest      | 17% (6/36)                                        | 12% (4/34)                | .62     | Early treatment response (5 d): reduction in pulmonary infection score to <6 or ≥2 from baseline | 36% (13/36)                                 | 65% (22/34) | .03     |                                                                                                                                  |
| Choi et al [15]  |                                                                                                                 |                                |                                     |            |                                                   |                           |         | End of treatment response: resolution of clinical signs and symptoms                             | 28% (10/36)                                 | 35% (12/34) | .61     |                                                                                                                                  |
| Ferry et al [17] | Retrospective single-center cohort study                                                                        | 52 (0)                         | ODI                                 | BMD        | ...                                               | ...                       | ...     | Persistent infection, recurrence, limb loss or death                                             | 47% (9/19)                                  | 60% (9/15)  | .54     |                                                                                                                                  |
| Haque et al [19] | Analysis of vancomycin-treated (>24 h) MRSA episodes selected from prospective multicenter IMPACT-HAP ICU study | 158 (0)                        | HAP                                 | Etest      | 23% (10/43) <sup>b</sup>                          | 36% (41/115) <sup>b</sup> | ND      |                                                                                                  | ...                                         | ...         | ...     | Propensity score analysis: 3-fold (OR 3.7; 95% CI, 1.45–9.62; <i>P</i> < .01) increase in mortality with 1 μg/mL increase in MIC |

Table 1 continued.

| Reference          | Study Population                                                   | Number of MRSA (MSSA) Isolates | Source                                              | MIC Method | Overall Mortality % (n)<br>Vancomycin MIC (µg/mL) |             |         | Definition of Treatment Failure                                | Treatment Failure<br>Vancomycin MIC (µg/mL) |             |         | Comments                                                                                                                                                                          |
|--------------------|--------------------------------------------------------------------|--------------------------------|-----------------------------------------------------|------------|---------------------------------------------------|-------------|---------|----------------------------------------------------------------|---------------------------------------------|-------------|---------|-----------------------------------------------------------------------------------------------------------------------------------------------------------------------------------|
|                    |                                                                    |                                |                                                     |            | <1.5                                              | ≥1.5        | P Value |                                                                | <1.5                                        | ≥1.5        | P Value |                                                                                                                                                                                   |
| Hidayat et al [21] | Prospective, single-center, vancomycin-treated(>72 h) cohort study | 95 (0)                         | Any BSI<br>High- and low-risk<br>BSI sources: ND    | Etest      | 9% (4/44)                                         | 24% (12/51) | .9      | No improvement or worsening of signs and symptoms of infection | 16% (7/44)                                  | 39% (20/51) | .01     | Greater number of patients with pneumonia and bacteremia in high vancomycin MIC group (≥1.5 µg/mL; <i>P</i> = .02) with greater failure in this subgroup vs other infection types |
| Holmes et al [23]  | Prospective multicenter study cohort study                         | 199 (0)                        | BSI<br>High Risk: 32%<br>Low Risk: 27%              | Etest      | 15% (16/105)                                      | 30% (28/94) | <.05    | Not studied                                                    |                                             |             |         | hVISA screening performed using GRD Etest on MIC 2 µg/mL isolates (0.4% positive)                                                                                                 |
| Holmes et al [23]  | Prospective multicenter study cohort study                         | 0 (324)                        | BSI<br>High risk: 24% <sup>c</sup><br>Low Risk: 19% | Etest      | 11% (26/239)                                      | 24% (20/85) | <.01    | Not studied                                                    |                                             |             |         |                                                                                                                                                                                   |
| Hsu et al [25]     | Prospective, single-center, vancomycin-treated (>72h) cohort study | 83 (0)                         | Any BSI<br>High- and low-risk<br>BSI sources: ND    | Etest      | ...                                               | ...         | ...     | No improvement or worsening of signs and symptoms of infection | 11% (4/38)                                  | 38% (17/45) | .03     | Comparison of BMD, Etest, and automated platforms: Etest most reliable predictor of treatment response                                                                            |
| Huang et al [26]   | Retrospective, single-center cohort study                          | 24 (13)                        | CNS                                                 | Etest      | 67% (12/18)                                       | 82% (9/11)  | .67     | Not studied                                                    | ...                                         | ...         | ...     | 8-year study examining patients with <i>S. aureus</i> meningitis; concurrent bacteremia in 10 (36%) cases.                                                                        |

Table 1 continued.

| Reference          | Study Population                                                                                                                                                                           | Number of MRSA (MSSA) Isolates | Source                                 | MIC Method | Overall Mortality % (n)<br>Vancomycin MIC ( $\mu\text{g/mL}$ ) |             |         | Definition of Treatment Failure                                                                  | Treatment Failure<br>Vancomycin MIC ( $\mu\text{g/mL}$ ) |             |         | Comments                                                                                                                                             |
|--------------------|--------------------------------------------------------------------------------------------------------------------------------------------------------------------------------------------|--------------------------------|----------------------------------------|------------|----------------------------------------------------------------|-------------|---------|--------------------------------------------------------------------------------------------------|----------------------------------------------------------|-------------|---------|------------------------------------------------------------------------------------------------------------------------------------------------------|
|                    |                                                                                                                                                                                            |                                |                                        |            | <1.5                                                           | $\geq 1.5$  | P Value |                                                                                                  | <1.5                                                     | $\geq 1.5$  | P Value |                                                                                                                                                      |
| Lalueza et al [32] | Retrospective, single-center cohort study                                                                                                                                                  | 63 (0)                         | BSI<br>High Risk: 6%<br>Low Risk: 44%  | Etest      | 28% (14/50)                                                    | 15% (2/13)  | .57     | Breakthrough bacteremia after 3 d of therapy                                                     | 34% (17/50)                                              | 23% (3/13)  | .67     | High MIC isolates associated with less sepsis ( $P = .005$ )                                                                                         |
| Liao et al [34]    | Retrospective single-center study                                                                                                                                                          | 177 (0)                        | BSI<br>High risk: 27%<br>Low risk: 28% | BMD        | 34% (46/137)                                                   | 33% (13/40) | ND      | Not studied                                                                                      | ...                                                      | ...         | ...     |                                                                                                                                                      |
| Lodise et al [36]  | Retrospective, single-center, vancomycin-treated (>24 h) cohort study                                                                                                                      | 92 (0)                         | BSI<br>High- and low-risk sources: ND  | Etest      | 12% (3/26)                                                     | 18% (12/66) | .5      | Microbiological failure: blood culture growing MRSA after 10 d of appropriate antibiotic therapy | 0% (0/26)                                                | 9% (6/66)   | .18     | Composite endpoint (mortality, microbiological failure and 60-d recurrence) increased in high MIC ( $\geq 1.5 \mu\text{g/mL}$ ) group ( $P = .049$ ) |
| Moise et al [41]   | Analysis of randomly selected (based on presence or absence of <i>agr-II</i> ) MRSA isolates from compassionate access prospectively collected multicenter isolate repository <sup>b</sup> | 34 (0)                         | BSI<br>High- and low-risk sources: ND  | BMD        | ...                                                            | ...         | ...     | Eradication of MRSA from blood culture at end of treatment                                       | 25% (5/20)                                               | 79% (11/14) | .01     | Treatment success and microbiological eradication was associated with increased vancomycin bactericidal activity at 24 h                             |

Table 1 continued.

| Reference               | Study Population                                                                                                                                                              | Number of MRSA (MSSA) Isolates | Source                                             | MIC Method | Overall Mortality % (n)<br>Vancomycin MIC ( $\mu\text{g/mL}$ ) |                           |         | Definition of Treatment Failure                                             | Treatment Failure<br>Vancomycin MIC ( $\mu\text{g/mL}$ ) |             |         | Comments                                                                                                               |
|-------------------------|-------------------------------------------------------------------------------------------------------------------------------------------------------------------------------|--------------------------------|----------------------------------------------------|------------|----------------------------------------------------------------|---------------------------|---------|-----------------------------------------------------------------------------|----------------------------------------------------------|-------------|---------|------------------------------------------------------------------------------------------------------------------------|
|                         |                                                                                                                                                                               |                                |                                                    |            | <1.5                                                           | $\geq 1.5$                | P Value |                                                                             | <1.5                                                     | $\geq 1.5$  | P Value |                                                                                                                        |
| Moise-Broder et al [42] | Analysis of randomly selected vancomycin-treated ( $\geq 5$ days) MRSA episodes from compassionate access prospectively collected multicenter isolate repository <sup>b</sup> | 63 (0)                         | Any 54% (34/63) BSI High- and low-risk sources: ND | BMD        | ...                                                            | ...                       | ...     | Persistent, worsening, or appearance of new signs and symptoms of infection | 58% (22/38)                                              | 92% (23/25) | .04     | Non- <i>agr</i> group II polymorphism was associated with treatment success (OR 6.94; 95% CI, 1.77–27.11; $P = .005$ ) |
| Musta et al [43]        | Retrospective, single-center, cohort study with MIC analysis in adequately (trough level $\geq 10 \mu\text{g/mL}$ ) vancomycin-treated episodes                               | 242 (0)                        | BSI High- and low-risk sources: ND                 | Etest      | 19% <sup>b</sup> (7/36)                                        | 29% <sup>b</sup> (60/206) | .05     | Not studied                                                                 | ...                                                      | ...         | ...     | hVISA (determined by Macromethod Etest) episodes excluded from data. <sup>b</sup> Mortality not associated with hVISA  |
| Neuner et al [45]       | Retrospective, single-center, vancomycin-treated cohort study                                                                                                                 | 196 (0)                        | BSI High risk: 18% <sup>c</sup> Low risk: 31%      | Etest      | 10% (1/10)                                                     | 21% (39/186)              | .11     | Not studied                                                                 | ...                                                      | ...         | ...     | High MIC ( $= 2 \mu\text{g/mL}$ ) associated with persistent bacteremia ( $> 5$ d) but not mortality                   |

Table 1 continued.

| Reference            | Study Population                                                                              | Number of MRSA (MSSA) Isolates | Source                                 | MIC Method | Overall Mortality % (n)<br>Vancomycin MIC ( $\mu\text{g/mL}$ ) |                        |            | Definition of Treatment Failure | Treatment Failure<br>Vancomycin MIC ( $\mu\text{g/mL}$ ) |            |         | Comments                                                                                                                                                                                                                                                             |
|----------------------|-----------------------------------------------------------------------------------------------|--------------------------------|----------------------------------------|------------|----------------------------------------------------------------|------------------------|------------|---------------------------------|----------------------------------------------------------|------------|---------|----------------------------------------------------------------------------------------------------------------------------------------------------------------------------------------------------------------------------------------------------------------------|
|                      |                                                                                               |                                |                                        |            | <1.5                                                           | $\geq 1.5$             | P Value    |                                 | <1.5                                                     | $\geq 1.5$ | P Value |                                                                                                                                                                                                                                                                      |
| Price et al [47]     | Prospective single-center study, all patients treated with vancomycin                         | 31 (14)                        | BSI<br>High- and low-risk sources: ND  | Etest      | 36% (9/25) <sup>b</sup>                                        | 5% (1/20) <sup>b</sup> | .022       | Not studied                     | ...                                                      | ...        | ...     | Patients with low MIC (<1.5 $\mu\text{g/mL}$ ) were more likely to die at 3 months compared with high MIC infections (OR 12; 95% CI, 1.7–83; $P < .01$ )                                                                                                             |
| Schweizer et al [50] | Retrospective, single-center study, including all MRSA episodes treated with vancomycin       | 312 (0) <sup>c</sup>           | BSI<br>High- and low-risk sources: ND  | Etest      | 18% (3/17)                                                     | 16% (46/295)           | Not stated | Not studied                     | ...                                                      | ...        | ...     | agr group II polymorphism associated with mortality ( $P = .05$ )                                                                                                                                                                                                    |
| Schweizer et al [50] | Treated with vancomycin                                                                       | 0 (169) <sup>b</sup>           | BSI<br>High- and low-risk sources: ND  | Etest      | 56% (5/9)                                                      | 16% (25/160)           | Not stated | Not studied                     | ...                                                      | ...        | ...     |                                                                                                                                                                                                                                                                      |
| Soriano et al [52]   | Retrospective, single-center, with MIC analysis performed on vancomycin-treated episodes only | 414 (0)                        | BSI<br>High Risk: 26%<br>Low Risk: 43% | Etest      | 28% (30/109)                                                   | 28% (86/305)           | Not stated | Not studied                     | ...                                                      | ...        | ...     | Vancomycin MIC of 2 $\mu\text{g/mL}$ was an independent predictor of mortality only in the subgroup of patients empirically treated with vancomycin (OR 6.39; 95% CI, 1.68–24.3; $P < .001$ ). Shock less likely to occur in episodes with MIC of 2 $\mu\text{g/mL}$ |



Table 1 continued.

| Reference          | Study Population                                                                                   | Number of MRSA (MSSA) Isolates | Source                                 | MIC Method | Overall Mortality % (n)<br>Vancomycin MIC ( $\mu\text{g/mL}$ ) |              |         | Definition of Treatment Failure | Treatment Failure<br>Vancomycin MIC ( $\mu\text{g/mL}$ ) |             |         | Comments                                                                                                                                  |
|--------------------|----------------------------------------------------------------------------------------------------|--------------------------------|----------------------------------------|------------|----------------------------------------------------------------|--------------|---------|---------------------------------|----------------------------------------------------------|-------------|---------|-------------------------------------------------------------------------------------------------------------------------------------------|
|                    |                                                                                                    |                                |                                        |            | <1.5                                                           | $\geq 1.5$   | P Value |                                 | <1.5                                                     | $\geq 1.5$  | P Value |                                                                                                                                           |
| Takesue et al [53] | Retrospective, single-center, vancomycin-treated cohort study                                      | 128 (0)                        | BSI<br>High risk: 34%<br>Low Risk: 51% | Etest      | 20% (17/87)                                                    | 66% (27/41)  | .001    | Not stated                      | 25% (22/87)                                              | 59% (24/41) | <.001   | MIC of 2 $\mu\text{g/mL}$ was an independent predictor of mortality (OR 6.05; 95% CI, 2.3–15.93; $P < .001$ ) on multivariate analysis.   |
| Takesue et al [53] |                                                                                                    | 631 (0)                        | Non-BSI                                |            | 8% (45/575)                                                    | 11% (6/56)   | .617    | Not stated                      | 11% (63/575)                                             | 18% (10/56) | .073    |                                                                                                                                           |
| Van Hal et al [54] | Retrospective, single center                                                                       | 353 (0) <sup>b,d</sup>         | BSI<br>High Risk: 18%<br>Low Risk: 38% | Etest      | 31% (73/236)                                                   | 32% (37/117) | .63     | Not studied                     |                                                          |             |         | hVISA in ST239 MRSA isolates was an independent predictor of reduced mortality (OR 0.27; 95% CI, .09–.83; $P = .022$ )                    |
| Wang et al [55]    | Retrospective, single-center, vancomycin-treated cohort study                                      | 123 (0)                        | BSI<br>High risk: 37%<br>Low Risk: 41% | BMD        | 28% (27/97)                                                    | 50% (13/26)  | .057    | Not studied                     | ...                                                      | ...         | ...     | High MIC = 2 $\mu\text{g/mL}$ was an independent predictor of mortality (OR 2.39; 95% CI, 1.2–4.79; $P = .014$ ) on multivariate analysis |
| Yoon et al [58]    | Retrospective, single-center case-controlled study to assess risk factors of persistent bacteremia | 63 (0)                         | BSI<br>High- and low-risk sources: ND  | Vitek      | ...                                                            | ...          | ...     | Persistent bacteremia >7 d      | 38% (17/45)                                              | 78% (14/18) | .01     | Bacteremic persistence associated with infection-related mortality ( $P = .002$ )                                                         |

Table 1 continued.

| Reference                                         | Study Population                                                                                            | Number of MRSA (MSSA) Isolates | Source                                | MIC Method       | Overall Mortality % (n)<br>Vancomycin MIC (µg/mL) |            |            | Definition of Treatment Failure                                                                     | Treatment Failure<br>Vancomycin MIC (µg/mL) |              |            | Comments                                                                                                                                                                                                                                 |
|---------------------------------------------------|-------------------------------------------------------------------------------------------------------------|--------------------------------|---------------------------------------|------------------|---------------------------------------------------|------------|------------|-----------------------------------------------------------------------------------------------------|---------------------------------------------|--------------|------------|------------------------------------------------------------------------------------------------------------------------------------------------------------------------------------------------------------------------------------------|
|                                                   |                                                                                                             |                                |                                       |                  | <1.5                                              | ≥1.5       | P Value    |                                                                                                     | <1.5                                        | ≥1.5         | P Value    |                                                                                                                                                                                                                                          |
| Studies using alternative vancomycin MIC cut-offs |                                                                                                             |                                |                                       |                  |                                                   |            |            |                                                                                                     |                                             |              |            |                                                                                                                                                                                                                                          |
|                                                   |                                                                                                             |                                |                                       |                  | Vancomycin MIC (µg/mL)                            |            |            |                                                                                                     | Vancomycin MIC (µg/mL)                      |              |            |                                                                                                                                                                                                                                          |
|                                                   |                                                                                                             |                                |                                       |                  | ≤0.5                                              | 2          | P value    |                                                                                                     | ≤0.5                                        | 2            | P value    |                                                                                                                                                                                                                                          |
| Maclayton et al [39]                              | Retrospective, single-center, vancomycin-treated cohort study in patients undergoing hemodialysis           | 50 (0)                         | BSI<br>High- and low-risk sources: ND | Vitek            | 24% (8/33)                                        | 35% (6/17) | Not stated | Not studied                                                                                         | ...                                         | ...          | ...        | Hospitalization costs significantly greater in high MIC group                                                                                                                                                                            |
|                                                   |                                                                                                             |                                |                                       |                  | Vancomycin MIC (µg/mL)                            |            |            |                                                                                                     | Vancomycin MIC (µg/mL)                      |              |            |                                                                                                                                                                                                                                          |
|                                                   |                                                                                                             |                                |                                       |                  | ≤0.5                                              | ≥1         | P value    |                                                                                                     | ≤0.5                                        | ≥1           | P value    |                                                                                                                                                                                                                                          |
| Rubinstein et al [48]                             | Multicenter, randomized, controlled double-blind phase III trial of telavancin vs vancomycin (ATTAIN study) | 133 (0)                        | HAP                                   | BMD <sup>d</sup> | ...                                               | ...        | ...        | Persistence or progression of signs and symptoms, or progression of radiological signs of pneumonia | 79% (22/28)                                 | 74% (78/105) | Not stated | Monomicrobial <i>S. aureus</i> HAP episodes with MIC ≥1 µg/mL significantly more likely to be cured with telavancin compared with vancomycin (treatment difference 12.5%; 95% CI, .5–23; <i>P</i> = .03); no MIC 1.5 or 2 µg/mL isolates |

Table 1 continued.

| Reference           | Study Population                                                                                                                                                                   | Number of MRSA (MSSA) Isolates | Source                                             | MIC Method | Overall Mortality % (n)<br>Vancomycin MIC (μg/mL) |      |         | Definition of Treatment Failure                                             | Treatment Failure<br>Vancomycin MIC (μg/mL) |             |         | Comments                                                                       |
|---------------------|------------------------------------------------------------------------------------------------------------------------------------------------------------------------------------|--------------------------------|----------------------------------------------------|------------|---------------------------------------------------|------|---------|-----------------------------------------------------------------------------|---------------------------------------------|-------------|---------|--------------------------------------------------------------------------------|
|                     |                                                                                                                                                                                    |                                |                                                    |            | <1.5                                              | ≥1.5 | P Value |                                                                             | <1.5                                        | ≥1.5        | P Value |                                                                                |
| Sakoulas et al [49] | Analysis of randomly selected vancomycin-treated (≥5 days), persistently bacteremic MRSA episodes from compassionate access prospectively collected multicenter isolate repository | 30 (0)                         | BSI<br>High- and low-risk sources: ND <sup>c</sup> | BMD        | ...                                               | ...  | ...     | Persistent, worsening, or appearance of new signs and symptoms of infection | 44% (4/9)                                   | 90% (19/21) | .01     | Treatment failure was associated with reduced vancomycin bactericidal activity |

Abbreviations: *agr*, accessory gene regulator; BMD, broth microdilution; BSI, bloodstream infection; CI, confidence interval; CNS, central nervous system infection—meningitis; GRD, glycopeptide resistance detection Etest; HAP, hospital-acquired pneumonia; HAP ICU, hospital-acquired pneumonia intensive care unit; hVISA, heteroresistant vancomycin-intermediate *S. aureus*; ICE, International Collaboration on Endocarditis; MIC, minimum inhibitory concentration; MRSA, methicillin-resistant *S. aureus*; MSSA, methicillin-susceptible *S. aureus*; ND, not described; ODI, orthopedic device infection; OR, odds ratio; PAP-AUC, population analysis profile area under the curve.

<sup>a</sup> The same isolate repository containing approximately 400 MRSA isolates from 200 patients were used for all 3 studies.

<sup>b</sup> Data obtained through communications with the relevant authors.

<sup>c</sup> A high-risk bacteremic source included endovascular sources, lower respiratory tract, abdominal sources, and CNS foci; while low-risk sources included intravenous catheters and urinary tract. The remaining BSI episodes are classified as intermediate-risk sources, which included osteoarticular sources, soft-tissue, and unknown sources. For further details see reference [52].

<sup>d</sup> All isolates underwent hVISA testing by population analysis—data represents vancomycin-susceptible *S. aureus* isolates only.

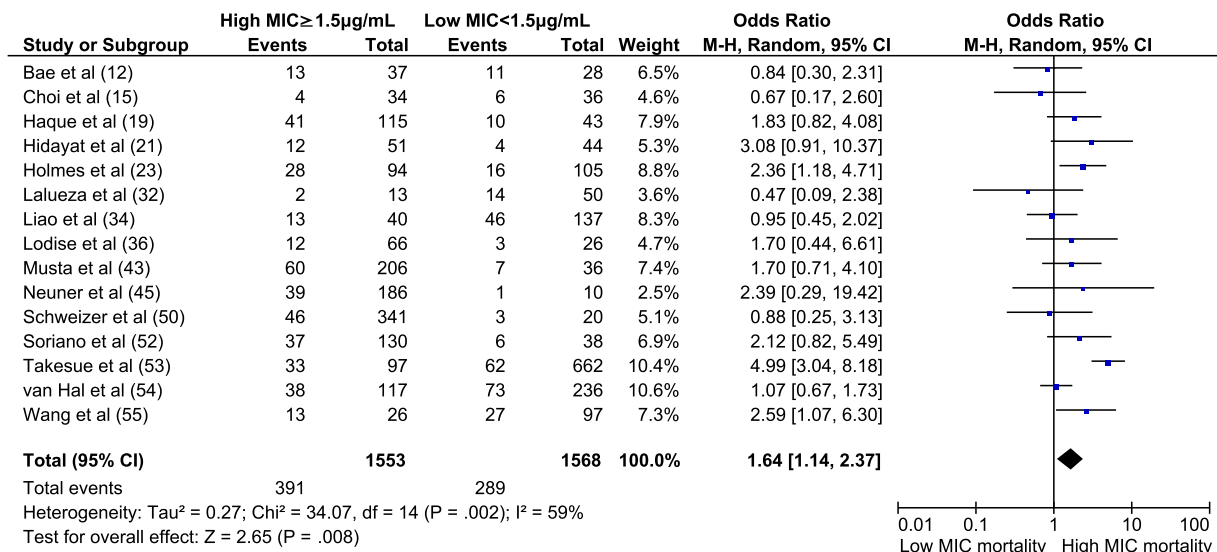

**Figure 2.** Forest plot (using Mantel-Haenszel analysis) of events denoting methicillin-resistant *S. aureus* mortality (irrespective of source of infection and minimum inhibitory concentration [MIC] methodology used) comparing high vancomycin MIC ( $\geq 1.5 \mu\text{g/mL}$ ) with low MIC ( $< 1.5 \mu\text{g/mL}$ ) infections. Squares indicate point estimates, and the size of the square indicates the weight of each study. Abbreviations: CI, confidence interval; M-H, Mantel-Haenszel; MIC, minimum inhibitory concentration.

### Heterogeneity and Publication Bias

There was significant heterogeneity in mortality among the pooled studies, with the prevalence of high MIC ( $\geq 1.5 \mu\text{g/mL}$ ) isolates ranging from 9% through 95%.

Because only 2 studies detailed *S. aureus* typing data [12, 54], it is unclear whether this heterogeneity is a consequence of specific MRSA clones. Similarly, hVISA infections may add to the heterogeneity among studies, with only 4 studies testing for heteroresistance [12, 23, 43, 54] and with hVISA episodes able to be excluded from only 2 studies [43, 54]. Furthermore, vancomycin prescribing differences and achieved targets could not be assessed, because no data were available from the relevant studies. With respect to treatment failure, heterogeneity among the pooled studies was marked secondary to the various different and nonstandardized definitions used for treatment failure.

## DISCUSSION

Two notable findings emerged from this comprehensive literature review. First, high vancomycin MIC ( $\geq 1.5 \mu\text{g/mL}$  by Etest) was associated with a higher mortality rate associated with MRSA infection; this association predominantly occurred in BSIs with an Etest vancomycin MIC  $\geq 2 \mu\text{g/mL}$ . Second, higher vancomycin MIC values ( $\geq 1.5 \mu\text{g/mL}$ ), irrespective of MIC testing methodology and infection source, were predictive of treatment failure. Again, the relationship between high vancomycin MICs and treatment failure was more pronounced in patients with MRSA BSIs than in patients with non-BSIs.

There are several possible explanations for these findings. First, MIC is a surrogate marker for a pathogen-specific factor responsible for worse outcomes or enhanced virulence secondary to antibiotic resistance [23, 59]. Clinical data argue against this, because shock occurs less frequently with high-MIC infections [32, 52]. Nevertheless, it is still feasible that pathogen-specific factors influence outcomes because polymorphisms in the accessory gene regulator (*agr*) have been found to be independently associated with treatment outcomes [42].

Second, episodes may represent hVISA infections, especially at high MICs ( $2 \mu\text{g/mL}$ ) [60] because high rates of treatment failure have been documented with heteroresistant isolates [61]. We attempted to exclude heteroresistance as a confounding variable by removing hVISA episodes. However, this is not feasible without formal testing of all isolates because heteroresistance can be detected at MICs as low as  $0.5 \mu\text{g/mL}$ . Despite this, hVISA is unlikely to account for all our results, because the overall prevalence of this phenotype remains uncommon [61].

Third, vancomycin is a suboptimal antibiotic. The optimal pharmacodynamic parameter that predicts vancomycin activity is the area under the curve to MIC ratio, with a ratio  $> 400$  associated with treatment success in patients with pneumonia [62] and BSI [30]. However, the probability of achieving this target is extremely low when the MIC value reaches  $2 \mu\text{g/mL}$ , even when maintaining vancomycin troughs of  $15\text{--}20 \mu\text{g/mL}$  [63].

Finally, it is likely that not one but all of these factors are responsible for treatment outcomes and mortality. Therefore,

**Table 2. Eligible Studies Examining the Association Between Mortality and Vancomycin Minimum Inhibitory Concentration (MIC) Classified by MIC Categories 1.5 µg/mL and 2 µg/mL Separately**

|                      | Study Population | Number of MRSA, (MSSA) Isolates | Source | MIC Method | Mortality% (n)           |                           |                           | Comments                                                                                         |
|----------------------|------------------|---------------------------------|--------|------------|--------------------------|---------------------------|---------------------------|--------------------------------------------------------------------------------------------------|
|                      |                  |                                 |        |            | Vancomycin MIC (µg/mL)   |                           |                           |                                                                                                  |
|                      |                  |                                 |        |            | ≤1                       | 1.5                       | ≥2                        |                                                                                                  |
| Bae et al [12]       | See Table 1      | 65 (0)                          | IE     | Etest      | 39% (11/28)              | 29% (9/31)                | 67% (4/6)                 | Mortality rates were similar for MIC results 1 vs 1.5 µg/mL (P = 1.0)                            |
| Haque et al [19]     | See Table 1      | 158 (0)                         | HAP    | Etest      | 23% <sup>a</sup> (10/43) | 30% <sup>a</sup> (26/86)  | 52% <sup>a</sup> (15/29)  |                                                                                                  |
| Holmes et al [23]    | See Table 1      | 199 (324)                       | BSI    | Etest      | 12% <sup>a</sup> (7/57)  | 13% <sup>a</sup> (35/272) | 27% <sup>a</sup> (48/179) |                                                                                                  |
| Musta et al [43]     | See Table 1      | 242 (0)                         | BSI    | Etest      | 19% <sup>a</sup> (7/36)  | 27% <sup>a</sup> (50/185) | 48% (10/21)               | Vancomycin MIC independent predictor of mortality in empirically treated patients only (n = 168) |
| Neuner et al [45]    | See Table 1      | 196 (0)                         | BSI    | Etest      | 10% (1/10)               | 17% (18/110)              | 28% (21/76)               |                                                                                                  |
| Schweizer et al [50] | See Table 1      | 312 (0) <sup>a</sup>            | BSI    | Etest      | 15% <sup>a</sup> (3/20)  | 12% <sup>a</sup> (28/230) | 16% <sup>a</sup> (18/111) |                                                                                                  |
| Soriano et al [52]   | See Table 1      | 414 (0)                         | BSI    | Etest      | 28% (30/109)             | 27% (60/213)              | 28% (26/92)               |                                                                                                  |
| Van Hal et al [54]   | See Table 1      | 353 (0) <sup>a,b</sup>          | BSI    | Etest      | 31% (73/236)             | 33% (32/96)               | 24% (5/21)                |                                                                                                  |

Abbreviations: BSI, bloodstream infection; HAP, hospital-acquired pneumonia; IE, infective endocarditis; MIC, minimum inhibitory concentration; MRSA, methicillin-resistant *S. aureus*; MSSA, methicillin-susceptible *S. aureus*.

<sup>a</sup> Data obtained through personal communications with the relevant author.

<sup>b</sup> All isolates underwent heteroresistant vancomycinintermediate *S. aureus* testing by population analysis—data represents vancomycin-susceptible *S. aureus* isolates only.

our findings underscore the need for additional studies to better describe the mechanisms and factors leading to worse outcomes among patients with MRSA infection. Furthermore, additional clinical studies are needed to determine whether the adverse outcomes observed in patients with higher vancomycin values can be remedied by optimizing vancomycin treatment, switching to an alternative agent, and maximizing surgical management.

Our findings have implications for clinical practice. In particular, the results suggest that institutions should consider conducting Etest MICs on all MRSA BSI isolates to identify patients at greatest risk for mortality and treatment failure. On the basis of the limited clinical data and current laboratory studies, alternative MIC methods cannot be recommended as a surrogate for Etest because the correlation between MIC testing methods is moderate to poor [64]. Etest MIC results are

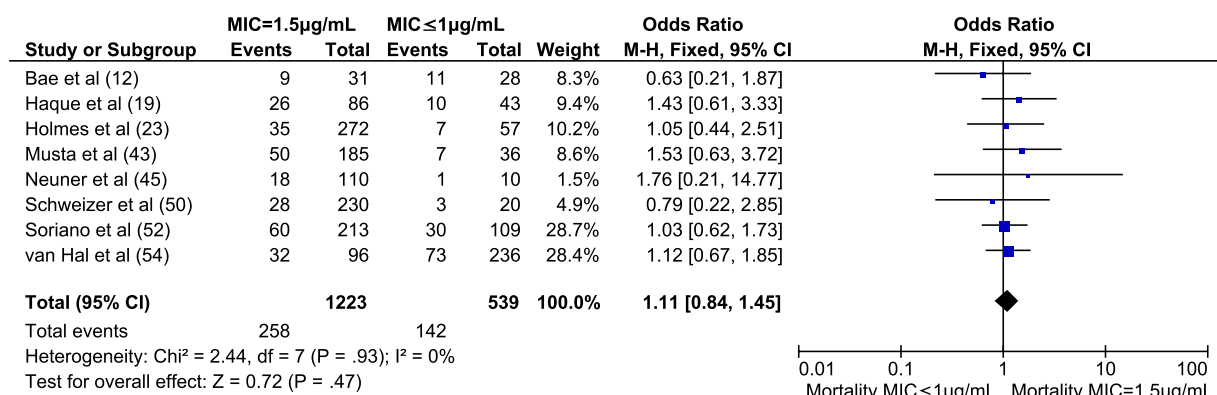

**Figure 3.** Forest plot (using Mantel-Haenszel analysis) of events denoting *S. aureus* mortality (irrespective of source of infection) comparing Etest vancomycin minimum inhibitory concentrations (MIC) of 1.5 µg/mL with MIC ≤1 µg/mL. Squares indicate point estimates, and the size of the square indicates the weight of each study. Abbreviations: CI, confidence interval; M-H, Mantel-Haenszel; MIC, minimum inhibitory concentration.

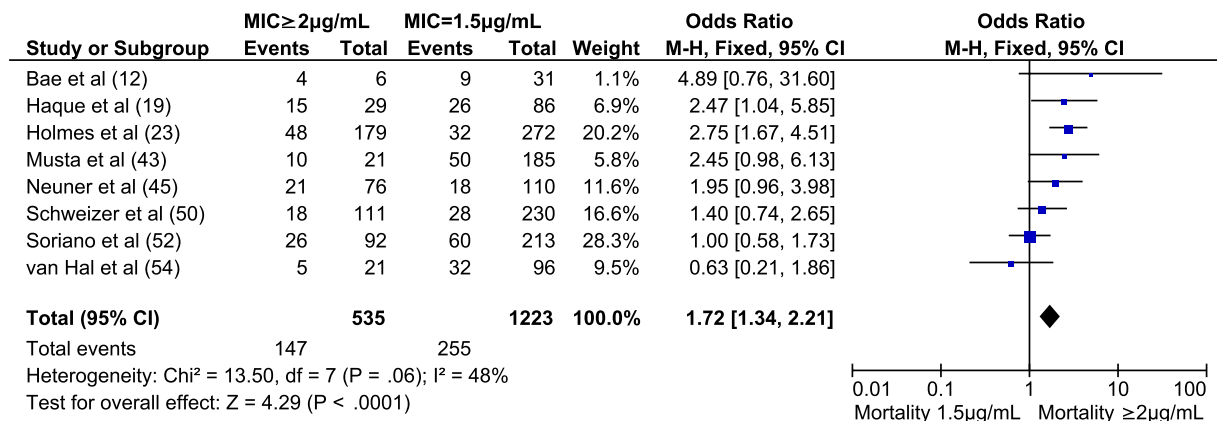

**Figure 4.** Forest plot (using Mantel-Haenszel analysis) of events denoting *S. aureus* mortality (irrespective of source of infection) comparing Etest vancomycin minimum inhibitory concentrations (MIC) of 1.5  $\mu\text{g/mL}$  with MIC  $\geq 2$   $\mu\text{g/mL}$ . Squares indicate point estimates, and the size of the square indicates the weight of each study. Abbreviations: CI, confidence interval; M-H, Mantel-Haenszel; MIC, minimum inhibitory concentration.

generally 0.5–1 dilution higher than the gold standard BMD, whereas automated systems generally produce MIC results 1–2 dilutions lower than the gold standard [64, 65, 66]. Furthermore, these differences are not predictable and cannot simply be inferred [64]. Although the results indicate that higher vancomycin MIC values in the susceptibility window are associated with adverse outcomes, we do not support lowering the susceptibility breakpoint. Most of the vancomycin MIC outcomes studies involved Etest. As stated previously, Etest tends to be 0.5–1  $\log_2$  dilution higher than the gold standard BMD. Until data show that vancomycin MICs of 2  $\mu\text{g/mL}$  by BMD predict mortality, we are not in favor of lowering the CLSI breakpoint.

These findings also suggest that alternative anti-MRSA agents should be considered for MRSA BSI with vancomycin MICs  $\geq 2$   $\mu\text{g/L}$  by Etest, especially in patients with persistent disease [67]. Although these data highlight emerging failure concerns with vancomycin, there are currently no data to support better survival rates with alternative antibiotics for MRSA BSI. Only daptomycin has been licensed for the treatment of MRSA BSI and showed outcomes similar to vancomycin in these patients [68]. Furthermore, cross-resistance between high vancomycin MIC isolates and daptomycin has been noted and associated with daptomycin treatment failure [69]. Thus, care should be taken before substitution of vancomycin, and vancomycin should not be automatically relegated to second-line therapy.

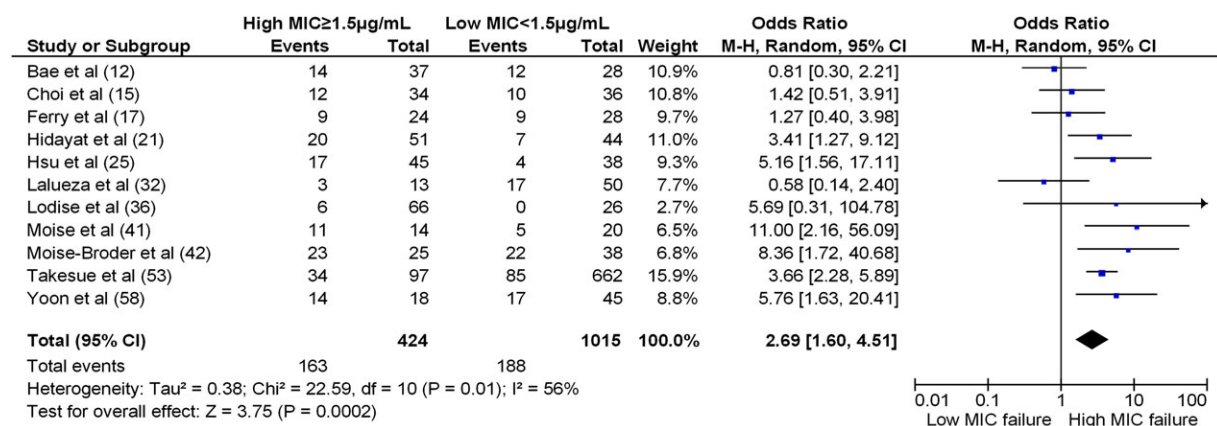

**Figure 5.** Forest plot (using Mantel-Haenszel analysis) of events denoting *S. aureus* vancomycin treatment failure (irrespective of definition, source of infection and minimum inhibitory concentration [MIC] methodology used) comparing high vancomycin MIC ( $\geq 1.5$   $\mu\text{g/mL}$ ) with low MIC ( $<1.5$   $\mu\text{g/mL}$ ) infections. Squares indicate point estimates, and the size of the square indicates the weight of each study. Abbreviations: CI, confidence interval; M-H, Mantel-Haenszel; MIC, minimum inhibitory concentration.

In the absence of further comparative trials, we are unable to recommend the best alternative agent for treatment of these infections. Data are sorely needed to determine whether other agents can remedy the outcomes observed with vancomycin for MRSA infection with elevated vancomycin MIC.

Several points should be noted when interpreting these results. Outcomes were not stratified by the mortality risk associated with source of bacteremia [52] or by whether source control was adequate (eg, debridement, device removal, or line removal). In the absence of data, definitive conclusions regarding the impact of these variables on the observed outcomes cannot be inferred, and further studies should consider these key covariates as stratifying variables. Although we attempted to exclude hVISA-positive isolates from the analysis, hVISA testing was not performed in every study. Therefore, future studies should consider inclusion of hVISA testing to assess the relationship between vancomycin MIC values and outcomes among patients with *S. aureus* infection. Finally, limited information was available on vancomycin concentration profiles. Among studies that stratified outcomes by trough concentrations, it does not appear to affect the observed association between vancomycin MIC and mortality and treatment failure [21, 36]. Because of the recent Infectious Diseases Society of America MRSA recommendations for vancomycin therapy, the vancomycin exposure profile should be a key covariate in future analyses. At a minimum, studies should stratify the relationship between vancomycin MIC and outcomes by trough concentrations.

In conclusion, the results suggest that patients with MRSA BSI and higher vancomycin MIC values by Etest have a higher likelihood of mortality and treatment failure. The cause of increased adverse outcomes among patients with higher vancomycin MIC values is not well defined but most likely reflects an interaction among pathogen-specific variables, host responses, and suboptimal vancomycin exposure. On the basis of our findings, nonvancomycin anti-MRSA therapies should be considered for patients with MRSA BSI with high vancomycin MIC, especially for values  $\geq 2.0$   $\mu\text{g/mL}$  by Etest. Although these data highlight emerging failure concerns with vancomycin, there are currently no data to support better survival rates with alternative antibiotics for MRSA BSI. Prospective studies are needed to determine whether optimizing vancomycin therapy can improve outcomes without subjecting patients to an increased risk of vancomycin-related toxicities.

## Notes

**Acknowledgments.** We thank Allison Krug, MPH, for her thoughtful editing.

**Potential conflicts of interest.** S. J. vH. has received grant support from Novartis, Pfizer, Merck, and Gilead. T. P. L. is a consultant for Pfizer, Cubist Pharmaceuticals, Astellas, and Forest; a speaker for Pfizer, Forest, and Cubist Pharmaceuticals; and has received grant support from Astellas,

Cubist, and Pfizer. D. L. P. is a consultant for Leo Pharmaceuticals, Novartis, Johnson & Johnson, Merck, and AstraZenica.

All authors have submitted the ICMJE Form for Disclosure of Potential Conflicts of Interest. Conflicts that the editors consider relevant to the content of the manuscript have been disclosed.

## References

1. Tobin-D'Angelo M, Arnold K, Lance-Parker S, et al. Methicillin-resistant *Staphylococcus aureus* infections in correctional facilities—Georgia, California, and Texas, 2001–2003. *MMWR Morb Mortal Wkly Rep* **2003**; 52:992–6.
2. Cardo D, Horan T, Andrus M, et al. National nosocomial infections surveillance (NNIS) system report, data summary from January 1992 through June 2004, issued October 2004. *Am J Infect Control* **2004**; 32:470–85.
3. Culpepper R, Nolan R, Chapman S, et al. Methicillin-resistant *Staphylococcus aureus* skin or soft tissue infections in a state prison—Mississippi, 2000. *MMWR Morb Mortal Wkly Rep* **2001**; 50:919–22.
4. Fridkin SK, Hageman JC, Morrison M, et al. Methicillin-resistant *Staphylococcus aureus* disease in three communities. *N Engl J Med* **2005**; 352:1436–4.
5. Kazakova SV, Hageman JC, Matava M, et al. A clone of methicillin-resistant *Staphylococcus aureus* among professional football players. *N Engl J Med* **2005**; 352:468–75.
6. Naimi TS, LeDell KH, Como-Sabetti K, et al. Comparison of community and health care-associated methicillin-resistant *Staphylococcus aureus* infection. *JAMA* **2003**; 290:2976–84.
7. Kirst HA, Thompson DG, Nicas TI. Historical yearly usage of vancomycin. *Antimicrob Agents Chemother* **1998**; 42:1303–4.
8. Steinkraus G, White R, Friedrich L. Vancomycin MIC creep in non-vancomycin-intermediate *Staphylococcus aureus* (VISA), vancomycin-susceptible clinical methicillin-resistant *S. aureus* (MRSA) blood isolates from 2001–05. *J Antimicrob Chemother* **2007**; 60:788–94.
9. Jones RN. Microbiological features of vancomycin in the 21st century: minimum inhibitory concentration creep, bactericidal/static activity, and applied breakpoints to predict clinical outcomes or detect resistant strains. *Clin Infect Dis* **2006**; 42(Suppl 1):S13–24.
10. Review Manager (RevMan) [Computer program]. Version 5.1. Copenhagen: The Nordic Cochrane Centre, The Cochrane Collaboration, 2011.
11. Wong SS, Ng TK, Yam WC, et al. Bacteremia due to *Staphylococcus aureus* with reduced susceptibility to vancomycin. *Diagn Microbiol Infect Dis* **2000**; 36:261–8.
12. Bae IG, Federspiel JJ, Miro JM, et al. Heterogeneous vancomycin-intermediate susceptibility phenotype in bloodstream methicillin-resistant *Staphylococcus aureus* isolates from an international cohort of patients with infective endocarditis: prevalence, genotype, and clinical significance. *J Infect Dis* **2009**; 200:1355–66.
13. Beeston CJ, Gupta R, Chadwick PR, Young RJ. Methicillin-resistant *Staphylococcus aureus* bacteraemia and mortality in a teaching hospital. *Eur J Clin Microbiol Infect Dis* **2009**; 28:585–90.
14. Burnie J, Matthews R, Jiman-Fatami A, Gottardello P, Hodgetts S, D'Arcy S. Analysis of 42 cases of septicemia caused by an epidemic strain of methicillin-resistant *Staphylococcus aureus*: evidence of resistance to vancomycin. *Clin Infect Dis* **2000**; 31:684–9.
15. Choi EY, Huh JW, Lim CM, et al. Relationship between the MIC of vancomycin and clinical outcome in patients with MRSA nosocomial pneumonia. *Intensive Care Med* **2011**; 37:639–47.
16. Corey GR, Wilcox M, Talbot GH, et al. Integrated analysis of CANVAS 1 and 2: phase 3, multicenter, randomized, double-blind studies to evaluate the safety and efficacy of ceftaroline versus vancomycin plus aztreonam in complicated skin and skin-structure infection. *Clin Infect Dis* **2010**; 51:641–50.
17. Ferry T, Uckay I, Vaudaux P, et al. Risk factors for treatment failure in orthopedic device-related methicillin-resistant *Staphylococcus aureus* infection. *Eur J Clin Microbiol Infect Dis* **2010**; 29:171–80.



18. Fridkin SK. Vancomycin-intermediate and -resistant *Staphylococcus aureus*: what the infectious disease specialist needs to know. *Clin Infect Dis* **2001**; 32:108–15.
19. Haque NZ, Zuniga LC, Peyrani P, et al. Relationship of vancomycin minimum inhibitory concentration to mortality in patients with methicillin-resistant *Staphylococcus aureus* hospital-acquired, ventilator-associated, or health-care-associated pneumonia. *Chest* **2010**; 138: 1356–62.
20. Hawkins C, Huang J, Jin N, Noskin GA, Zembower TR, Bolon M. Persistent *Staphylococcus aureus* bacteremia: an analysis of risk factors and outcomes. *Arch Intern Med* **2007**; 167:1861–7.
21. Hidayat LK, Hsu DI, Quist R, Shriner KA, Wong-Beringer A. High-dose vancomycin therapy for methicillin-resistant *Staphylococcus aureus* infections: efficacy and toxicity. *Arch Intern Med* **2006**; 166: 2138–44.
22. Hiramatsu K, Aritaka N, Hanaki H, et al. Dissemination in Japanese hospitals of strains of *Staphylococcus aureus* heterogeneously resistant to vancomycin. *Lancet* **1997**; 350:1670–3.
23. Holmes NE, Turnidge JD, Munchhof WJ, et al. Antibiotic choice may not explain poorer outcomes in patients with *Staphylococcus aureus* bacteremia and high vancomycin minimum inhibitory concentrations. *J Infect Dis* **2011**; 204:340–7.
24. Horne KC, Howden BP, Grabsch EA, et al. Prospective comparison of the clinical impacts of heterogeneous vancomycin-intermediate methicillin-resistant *Staphylococcus aureus* (MRSA) and vancomycin-susceptible MRSA. *Antimicrob Agents Chemother* **2009**; 53:3447–52.
25. Hsu DI, Hidayat LK, Quist R, et al. Comparison of method-specific vancomycin minimum inhibitory concentration values and their predictability for treatment outcome of methicillin-resistant *Staphylococcus aureus* (MRSA) infections. *Int J Antimicrob Agents* **2008**; 32:378–85.
26. Huang WC, Lee CH, Liu JW. Clinical characteristics and risk factors for mortality in patients with meningitis caused by *Staphylococcus aureus* and vancomycin minimal inhibitory concentrations against these isolates. *J Microbiol Immunol Infect* **2010**; 43:470–7.
27. Jimenez-Truque N, Thomsen I, Saye E, Creech CB. Should higher vancomycin trough levels be targeted for invasive community-acquired methicillin-resistant *Staphylococcus aureus* infections in children? *Pediatr Infect Dis J* **2010**; 29:368–70.
28. Khatib R, Jose J, Musta A, et al. Relevance of vancomycin-intermediate susceptibility and heteroresistance in methicillin-resistant *Staphylococcus aureus* bacteraemia. *J Antimicrob Chemother* **2011**; 66:1594–9.
29. Khosrovaneh A, Riederer K, Saeed S, et al. Frequency of reduced vancomycin susceptibility and heterogeneous subpopulation in persistent or recurrent methicillin-resistant *Staphylococcus aureus* bacteremia. *Clin Infect Dis* **2004**; 38:1328–30.
30. Kullar R, Davis SL, Levine DP, Rybak MJ. Impact of vancomycin exposure on outcomes in patients with methicillin-resistant *Staphylococcus aureus* bacteremia: support for consensus guidelines suggested targets. *Clin Infect Dis* **2011**; 52:975–81.
31. Laible BR, Hellwig TR, Hedge DD. Susceptibility of *Staphylococcus aureus* to vancomycin: analysis of minimum inhibitory concentrations in two tertiary care hospitals in eastern South Dakota. *S D Med* **2011**; 64:91–5.
32. Lalueza A, Chaves F, San Juan R, Daskalaki M, Otero JR, Aguado JM. Is high vancomycin minimum inhibitory concentration a good marker to predict the outcome of methicillin-resistant *Staphylococcus aureus* bacteremia? *J Infect Dis* **2010**; 201:311–2. author reply 2–3.
33. Lewis T, Chaudhry R, Nightingale P, Lambert P, Das I. Methicillin-resistant *Staphylococcus aureus* bacteremia: epidemiology, outcome, and laboratory characteristics in a tertiary referral center in the UK. *Int J Infect Dis* **2011**; 15:e131–5.
34. Liao CH, Chen SY, Huang YT, Hsueh PR. Outcome of patients with methicillin-resistant *Staphylococcus aureus* bacteraemia at an Emergency Department of a medical centre in Taiwan. *Int J Antimicrob Agents* **2008**; 32:326–32.
35. Lin SH, Liao WH, Lai CC, et al. Risk factors for mortality in patients with persistent methicillin-resistant *Staphylococcus aureus* bacteraemia in a tertiary care hospital in Taiwan. *J Antimicrob Chemother* **2010**; 65:1792–8.
36. Lodise TP, Graves J, Evans A, et al. Relationship between vancomycin MIC and failure among patients with methicillin-resistant *Staphylococcus aureus* bacteremia treated with vancomycin. *Antimicrob Agents Chemother* **2008**; 52:3315–20.
37. Lubin AS, Snyderman DR, Ruthazer R, Bide P, Golan Y. Predicting high vancomycin minimum inhibitory concentration in methicillin-resistant *Staphylococcus aureus* bloodstream infections. *Clin Infect Dis* **2011**; 52:997–1002.
38. Lutz L, Machado A, Kuplich N, Barth AL. Clinical failure of vancomycin treatment of *Staphylococcus aureus* infection in a tertiary care hospital in southern Brazil. *Braz J Infect Dis* **2003**; 7:224–8.
39. MacLayton DO, Suda KJ, Coval KA, York CB, Garey KW. Case-control study of the relationship between MRSA bacteremia with a vancomycin MIC of 2 microg/mL and risk factors, costs, and outcomes in inpatients undergoing hemodialysis. *Clin Ther* **2006**; 28:1208–16.
40. Maor Y, Hagin M, Belasov N, Keller N, Ben-David D, Rahav G. Clinical features of heteroresistant vancomycin-intermediate *Staphylococcus aureus* bacteremia versus those of methicillin-resistant *S. aureus* bacteremia. *J Infect Dis* **2009**; 199:619–24.
41. Moise PA, Sakoulas G, Forrest A, Schentag JJ. Vancomycin in vitro bactericidal activity and its relationship to efficacy in clearance of methicillin-resistant *Staphylococcus aureus* bacteremia. *Antimicrob Agents Chemother* **2007**; 51:2582–6.
42. Moise-Broder PA, Sakoulas G, Eliopoulos GM, Schentag JJ, Forrest A, Moellering RC Jr. Accessory gene regulator group II polymorphism in methicillin-resistant *Staphylococcus aureus* is predictive of failure of vancomycin therapy. *Clin Infect Dis* **2004**; 38:1700–5.
43. Musta AC, Riederer K, Shemes S, et al. Vancomycin MIC plus heteroresistance and outcome of methicillin-resistant *Staphylococcus aureus* bacteremia: trends over 11 years. *J Clin Microbiol* **2009**; 47: 1640–4.
44. Neoh HM, Hori S, Komatsu M, et al. Impact of reduced vancomycin susceptibility on the therapeutic outcome of MRSA bloodstream infections. *Ann Clin Microbiol Antimicrob* **2007**; 6:13.
45. Neuner EA, Casabar E, Reichley R, McKinnon PS. Clinical, microbiologic, and genetic determinants of persistent methicillin-resistant *Staphylococcus aureus* bacteremia. *Diagn Microbiol Infect Dis* **2010**; 67: 228–33.
46. Porath AD, Brooks GD. Vancomycin minimum inhibitory concentration as a predictor of mortality in methicillin-resistant *Staphylococcus aureus* bacteremia: a second look. *Clin Infect Dis* **2008**; 46: 1483–4. author reply 4–5.
47. Price J, Atkinson S, Llewelyn M, Paul J. Paradoxical relationship between the clinical outcome of *Staphylococcus aureus* bacteremia and the minimum inhibitory concentration of vancomycin. *Clin Infect Dis* **2009**; 48:997–8.
48. Rubinstein E, Lalani T, Corey GR, et al. Telavancin versus vancomycin for hospital-acquired pneumonia due to gram-positive pathogens. *Clin Infect Dis* **2011**; 52:31–40.
49. Sakoulas G, Moise-Broder PA, Schentag J, Forrest A, Moellering RC Jr, Eliopoulos GM. Relationship of MIC and bactericidal activity to efficacy of vancomycin for treatment of methicillin-resistant *Staphylococcus aureus* bacteremia. *J Clin Microbiol* **2004**; 42:2398–402.
50. Schweizer ML, Furuno JP, Sakoulas G, et al. Increased mortality with accessory gene regulator (*agr*) dysfunction in *Staphylococcus aureus* among bacteremic patients. *Antimicrob Agents Chemother* **2011**; 55: 1082–7.
51. Shime N, Kosaka T, Fujita N. The importance of a judicious and early empiric choice of antimicrobial for methicillin-resistant *Staphylococcus aureus* bacteraemia. *Eur J Clin Microbiol Infect Dis* **2010**; 29:1475–9.



52. Soriano A, Marco F, Martinez JA, et al. Influence of vancomycin minimum inhibitory concentration on the treatment of methicillin-resistant *Staphylococcus aureus* bacteremia. *Clin Infect Dis* **2008**; 46: 193–200.
53. Takesue Y, Nakajima K, Takahashi Y, et al. Clinical characteristics of vancomycin minimum inhibitory concentration of 2 µg/ml methicillin-resistant *Staphylococcus aureus* strains isolated from patients with bacteremia. *J Infect Chemother* **2011**; 17:52–7.
54. van Hal SJ, Jones M, Gosbell IB, Paterson DL. Vancomycin heteroresistance is associated with reduced mortality in ST239 methicillin-resistant *Staphylococcus aureus* blood stream infections. *PLoS One* **2011**; 6:e21217.
55. Wang JL, Wang JT, Sheng WH, Chen YC, Chang SC. Nosocomial methicillin-resistant *Staphylococcus aureus* (MRSA) bacteremia in Taiwan: mortality analyses and the impact of vancomycin, MIC = 2 mg/L, by the broth microdilution method. *BMC Infect Dis* **2010**; 10:159.
56. Welsh KJ, Abbott AN, Lewis EM, et al. Clinical characteristics, outcomes, and microbiologic features associated with methicillin-resistant *Staphylococcus aureus* bacteremia in pediatric patients treated with vancomycin. *J Clin Microbiol* **2010**; 48:894–9.
57. Yamaki J, Lee M, Shriner KA, Wong-Beringer A. Can clinical and molecular epidemiologic parameters guide empiric treatment with vancomycin for methicillin-resistant *Staphylococcus aureus* infections? *Diagn Microbiol Infect Dis* **2011**; 70:124–30.
58. Yoon YK, Kim JY, Park DW, Sohn JW, Kim MJ. Predictors of persistent methicillin-resistant *Staphylococcus aureus* bacteraemia in patients treated with vancomycin. *J Antimicrob Chemother* **2010**; 65:1015–8.
59. Holland TL, Fowler VG Jr. Vancomycin minimum inhibitory concentration and outcome in patients with *Staphylococcus aureus* bacteremia: pearl or pellet? *J Infect Dis* **2011**; 204:329–31.
60. van Hal SJ, Wehrhahn MC, Barbagiannakos T, et al. Performance of various testing methodologies for detection of heteroresistant vancomycin-intermediate *Staphylococcus aureus* in bloodstream isolates. *J Clin Microbiol* **2011**; 49:1489–94.
61. van Hal SJ, Paterson DL. Systematic review and meta-analysis of the significance of heterogeneous vancomycin-intermediate *Staphylococcus aureus* isolates. *Antimicrob Agents Chemother* **2011**; 55: 405–10.
62. Moise-Broder PA, Forrest A, Birmingham MC, Schentag JJ. Pharmacodynamics of vancomycin and other antimicrobials in patients with *Staphylococcus aureus* lower respiratory tract infections. *Clin Pharmacokinet* **2004**; 43:925–42.
63. Patel N, Pai MP, Rodvold KA, Lomaestro B, Drusano GL, Lodise TP. Vancomycin: we can't get there from here. *Clin Infect Dis* **2011**; 52: 969–74.
64. Keel RA, Sutherland CA, Aslanzadeh J, Nicolau DP, Kuti JL. Correlation between vancomycin and daptomycin MIC values for methicillin-susceptible and methicillin-resistant *Staphylococcus aureus* by 3 testing methodologies. *Diagn Microbiol Infect Dis* **2010**; 68:326–9.
65. Charlesworth R, Warner M, Livermore DM, Wilson AP. Comparison of four methods for detection of teicoplanin resistance in methicillin-resistant *Staphylococcus aureus*. *J Antimicrob Chemother* **2006**; 58:186–9.
66. Bland CM, Porr WH, Davis KA, Mansell KB. Vancomycin MIC susceptibility testing of methicillin-susceptible and methicillin-resistant *Staphylococcus aureus* isolates: a comparison between E test® and an automated testing method. *South Med J* **2010**; 103:1124–8.
67. Liu C, Bayer A, Cosgrove SE, et al. Clinical practice guidelines by the Infectious Diseases Society of America for the treatment of methicillin-resistant *Staphylococcus aureus* infections in adults and children. *Clin Infect Dis* **2011**; 52:e18–55.
68. Fowler VG Jr, Boucher HW, Corey GR, et al. Daptomycin versus standard therapy for bacteremia and endocarditis caused by *Staphylococcus aureus*. *N Engl J Med* **2006**; 355:653–65.
69. van Hal SJ, Paterson DL, Gosbell IB. Emergence of daptomycin resistance following vancomycin-unresponsive *Staphylococcus aureus* bacteraemia in a daptomycin-naïve patient—a review of the literature. *Eur J Clin Microbiol Infect Dis* **2011**; 30:603–10.
